# Supplementary material for: Gender-Specific Differences in Gut Microbiota Composition Associated with Microbial Metabolites for Patients with Acne Vulgaris
Source: PubMed Central journal article supplement — Ann Dermatol. 2021 Nov 4;33(6):531–40. doi: 10.5021/ad.2021.33.6.531 (PMC8577912; doi:10.5021/ad.2021.33.6.531), 2021-11-04
Supplement: ad-33-531-s001.pdf [file ad-33-531-s001.pdf]

Supplementary Table 1. Gender-based difference of gut microbiota at genus level

| Taxonname                                | FAS                   |                                                 |                       | FCS                                             |                       |                                                 | MAS                   |                                                 |           | MCS    |      |        | p-value | FDR |
|------------------------------------------|-----------------------|-------------------------------------------------|-----------------------|-------------------------------------------------|-----------------------|-------------------------------------------------|-----------------------|-------------------------------------------------|-----------|--------|------|--------|---------|-----|
|                                          | Mean                  | 95% CI                                          | Mean      | 95% CI | Mean | 95% CI |         |     |
| <i>Lysinibacillus</i>                    | $1.03 \times 10^{-5}$ | $4.57 \times 10^{-7}$<br>$2.01 \times 10^{-5}$  | $5.13 \times 10^{-6}$ | $-2.32 \times 10^{-6}$<br>$1.26 \times 10^{-5}$ | 0                     | -                                               | $2.35 \times 10^{-5}$ | $1.21 \times 10^{-5}$<br>$3.48 \times 10^{-5}$  | $< 0.001$ | 0.044  |      |        |         |     |
| <i>Paenibacillus</i>                     | $7.44 \times 10^{-5}$ | $1.68 \times 10^{-5}$<br>$1.32 \times 10^{-4}$  | $3.85 \times 10^{-5}$ | $6.88 \times 10^{-6}$<br>$7.01 \times 10^{-5}$  | $3.02 \times 10^{-5}$ | $3.94 \times 10^{-6}$<br>$5.64 \times 10^{-5}$  | $1.54 \times 10^{-4}$ | $8.31 \times 10^{-5}$<br>$2.25 \times 10^{-4}$  | $< 0.001$ | 0.044  |      |        |         |     |
| <i>Aerococcus</i>                        | $7.69 \times 10^{-5}$ | $4.50 \times 10^{-6}$<br>$1.49 \times 10^{-4}$  | $4.36 \times 10^{-5}$ | $-2.61 \times 10^{-6}$<br>$8.98 \times 10^{-5}$ | $2.35 \times 10^{-5}$ | $-8.4 \times 10^{-9}$<br>$4.70 \times 10^{-5}$  | $1.57 \times 10^{-4}$ | $6.76 \times 10^{-5}$<br>$2.48 \times 10^{-4}$  | 0.002     | 0.046  |      |        |         |     |
| <i>Alkaliphilus</i>                      | $1.54 \times 10^{-5}$ | $-6.95 \times 10^{-6}$<br>$3.77 \times 10^{-5}$ | $2.31 \times 10^{-5}$ | $-9.71 \times 10^{-6}$<br>$5.59 \times 10^{-5}$ | $1.51 \times 10^{-5}$ | $-6.14 \times 10^{-7}$<br>$3.08 \times 10^{-5}$ | $5.70 \times 10^{-5}$ | $2.56 \times 10^{-5}$<br>$8.84 \times 10^{-5}$  | 0.003     | 0.047  |      |        |         |     |
| <i>Carnobacterium</i>                    | $1.10 \times 10^{-4}$ | $1.58 \times 10^{-5}$<br>$2.05 \times 10^{-5}$  | $6.67 \times 10^{-5}$ | $1.27 \times 10^{-6}$<br>$1.32 \times 10^{-4}$  | $2.85 \times 10^{-5}$ | $5.71 \times 10^{-6}$<br>$5.13 \times 10^{-5}$  | $2.26 \times 10^{-4}$ | $1.16 \times 10^{-4}$<br>$3.36 \times 10^{-4}$  | 0.002     | 0.047  |      |        |         |     |
| <i>Lactococcus</i>                       | $1.34 \times 10^{-3}$ | $1.40 \times 10^{-4}$<br>$2.53 \times 10^{-3}$  | $7.41 \times 10^{-4}$ | $2.33 \times 10^{-4}$<br>$1.25 \times 10^{-3}$  | $7.27 \times 10^{-4}$ | $1.90 \times 10^{-4}$<br>$1.27 \times 10^{-3}$  | $2.70 \times 10^{-3}$ | $1.41 \times 10^{-3}$<br>$3.98 \times 10^{-3}$  | 0.002     | 0.047  |      |        |         |     |
| <i>Oceanobacillus</i>                    | $6.64 \times 10^{-4}$ | $1.51 \times 10^{-4}$<br>$1.17 \times 10^{-3}$  | $3.80 \times 10^{-4}$ | $9.40 \times 10^{-5}$<br>$6.65 \times 10^{-4}$  | $3.05 \times 10^{-4}$ | $8.42 \times 10^{-5}$<br>$5.26 \times 10^{-4}$  | $1.22 \times 10^{-3}$ | $6.25 \times 10^{-4}$<br>$1.83 \times 10^{-3}$  | 0.003     | 0.047  |      |        |         |     |
| <i>Bacillus</i>                          | $2.22 \times 10^{-3}$ | $6.47 \times 10^{-4}$<br>$3.80 \times 10^{-3}$  | $1.20 \times 10^{-3}$ | $4.78 \times 10^{-4}$<br>$1.92 \times 10^{-3}$  | $1.05 \times 10^{-3}$ | $2.25 \times 10^{-4}$<br>$1.88 \times 10^{-3}$  | $3.98 \times 10^{-3}$ | $1.94 \times 10^{-3}$<br>$6.03 \times 10^{-3}$  | 0.004     | 0.064  |      |        |         |     |
| <i>Actinomyces</i>                       | $2.82 \times 10^{-5}$ | $8.89 \times 10^{-6}$<br>$4.75 \times 10^{-5}$  | $1.80 \times 10^{-5}$ | $1.99 \times 10^{-6}$<br>$3.39 \times 10^{-5}$  | $3.19 \times 10^{-5}$ | $-1.39 \times 10^{-6}$<br>$6.51 \times 10^{-5}$ | $8.39 \times 10^{-5}$ | $4.69 \times 10^{-5}$<br>$1.21 \times 10^{-4}$  | 0.005     | 0.0759 |      |        |         |     |
| <i>Blautia</i>                           | $2.42 \times 10^{-2}$ | $1.34 \times 10^{-2}$<br>$3.49 \times 10^{-2}$  | $3.44 \times 10^{-2}$ | $1.51 \times 10^{-2}$<br>$5.38 \times 10^{-2}$  | $2.28 \times 10^{-2}$ | $1.20 \times 10^{-2}$<br>$3.36 \times 10^{-2}$  | $4.53 \times 10^{-2}$ | $3.30 \times 10^{-2}$<br>$5.76 \times 10^{-2}$  | 0.019     | 0.171  |      |        |         |     |
| <i>Butyrivococcus</i>                    | $2.33 \times 10^{-3}$ | $1.44 \times 10^{-3}$<br>$3.21 \times 10^{-3}$  | $3.27 \times 10^{-3}$ | $1.75 \times 10^{-3}$<br>$4.79 \times 10^{-3}$  | $1.76 \times 10^{-3}$ | $1.14 \times 10^{-3}$<br>$2.37 \times 10^{-3}$  | $4.46 \times 10^{-3}$ | $3.06 \times 10^{-3}$<br>$5.87 \times 10^{-3}$  | 0.019     | 0.171  |      |        |         |     |
| <i>Gemmiger</i>                          | $6.95 \times 10^{-3}$ | $2.05 \times 10^{-3}$<br>$1.18 \times 10^{-2}$  | $9.06 \times 10^{-3}$ | $3.88 \times 10^{-3}$<br>$1.42 \times 10^{-2}$  | $5.42 \times 10^{-3}$ | $2.60 \times 10^{-3}$<br>$8.25 \times 10^{-3}$  | $1.58 \times 10^{-2}$ | $8.85 \times 10^{-3}$<br>$2.27 \times 10^{-2}$  | 0.017     | 0.171  |      |        |         |     |
| <i>Lachnospiracea<br/>incertae sedis</i> | $3.60 \times 10^{-2}$ | $2.01 \times 10^{-2}$<br>$5.19 \times 10^{-2}$  | $3.21 \times 10^{-2}$ | $1.72 \times 10^{-2}$<br>$4.69 \times 10^{-2}$  | $2.75 \times 10^{-2}$ | $1.64 \times 10^{-2}$<br>$3.85 \times 10^{-2}$  | $5.50 \times 10^{-2}$ | $4.07 \times 10^{-2}$<br>$6.92 \times 10^{-2}$  | 0.018     | 0.171  |      |        |         |     |
| <i>Odoribacter</i>                       | $2.06 \times 10^{-3}$ | $4.83 \times 10^{-4}$<br>$3.64 \times 10^{-3}$  | $6.24 \times 10^{-3}$ | $2.03 \times 10^{-3}$<br>$1.04 \times 10^{-2}$  | $2.01 \times 10^{-3}$ | $1.05 \times 10^{-3}$<br>$2.97 \times 10^{-3}$  | $1.36 \times 10^{-3}$ | $6.56 \times 10^{-4}$<br>$2.07 \times 10^{-3}$  | 0.015     | 0.171  |      |        |         |     |
| <i>Anaeroplasma</i>                      | $5.13 \times 10^{-6}$ | $-2.32 \times 10^{-6}$<br>$1.26 \times 10^{-5}$ | $2.57 \times 10^{-5}$ | $1.79 \times 10^{-6}$<br>$4.95 \times 10^{-5}$  | $1.68 \times 10^{-6}$ | $-1.78 \times 10^{-6}$<br>$5.13 \times 10^{-6}$ | $1.68 \times 10^{-6}$ | $-1.78 \times 10^{-6}$<br>$5.13 \times 10^{-6}$ | 0.023     | 0.189  |      |        |         |     |
| <i>Exiguobacterium</i>                   | $7.95 \times 10^{-5}$ | $2.17 \times 10^{-5}$<br>$1.37 \times 10^{-4}$  | $4.10 \times 10^{-5}$ | $1.66 \times 10^{-5}$<br>$6.54 \times 10^{-5}$  | $5.20 \times 10^{-5}$ | $2.21 \times 10^{-5}$<br>$8.19 \times 10^{-5}$  | $1.71 \times 10^{-4}$ | $7.40 \times 10^{-5}$<br>$2.68 \times 10^{-4}$  | 0.033     | 0.228  |      |        |         |     |
| <i>Pseudomonas</i>                       | $2.31 \times 10^{-5}$ | $6.99 \times 10^{-6}$<br>$3.92 \times 10^{-5}$  | $180 \times 10^{-5}$  | $1.26 \times 10^{-7}$<br>$3.59 \times 10^{-5}$  | $3.35 \times 10^{-6}$ | $-3.55 \times 10^{-6}$<br>$1.03 \times 10^{-5}$ | $2.18 \times 10^{-5}$ | $5.85 \times 10^{-6}$<br>$3.78 \times 10^{-5}$  | 0.035     | 0.235  |      |        |         |     |
| <i>Clostridium<br/>sensu stricto</i>     | $3.30 \times 10^{-3}$ | $8.61 \times 10^{-4}$<br>$5.74 \times 10^{-3}$  | $7.36 \times 10^{-4}$ | $2.54 \times 10^{-4}$<br>$1.22 \times 10^{-3}$  | $1.60 \times 10^{-3}$ | $6.04 \times 10^{-4}$<br>$2.61 \times 10^{-3}$  | $5.03 \times 10^{-3}$ | $1.76 \times 10^{-3}$<br>$8.30 \times 10^{-3}$  | 0.044     | 0.242  |      |        |         |     |

Supplementary Table 1. Continued

| Taxonname               | FAS                   |                                                   |                       | FCS                                               |                       |                                                   | MAS                   |                                                   |      | MCS    |  |  | p-value | FDR    |
|-------------------------|-----------------------|---------------------------------------------------|-----------------------|---------------------------------------------------|-----------------------|---------------------------------------------------|-----------------------|---------------------------------------------------|------|--------|--|--|---------|--------|
|                         | Mean                  | 95% CI                                            | Mean | 95% CI |  |  |         |        |
| <i>Enterococcus</i>     | $1.67 \times 10^{-4}$ | $-7.54 \times 10^{-5}$ ,<br>$4.09 \times 10^{-4}$ | $8.72 \times 10^{-5}$ | $-6.91 \times 10^{-5}$ ,<br>$2.44 \times 10^{-4}$ | $2.21 \times 10^{-4}$ | $-5.21 \times 10^{-6}$ ,<br>$4.48 \times 10^{-4}$ | $4.80 \times 10^{-4}$ | $-1.56 \times 10^{-4}$ ,<br>$1.12 \times 10^{-3}$ |      |        |  |  | 0.042   | 0.242  |
| <i>Faecalibacterium</i> | $5.52 \times 10^{-2}$ | $3.27 \times 10^{-2}$ ,<br>$7.78 \times 10^{-2}$  | $4.46 \times 10^{-2}$ | $2.86 \times 10^{-2}$ ,<br>$6.06 \times 10^{-2}$  | $4.41 \times 10^{-2}$ | $3.19 \times 10^{-2}$ ,<br>$5.62 \times 10^{-2}$  | $7.16 \times 10^{-2}$ | $5.47 \times 10^{-2}$ ,<br>$8.85 \times 10^{-2}$  |      |        |  |  | 0.040   | 0.242  |
| <i>Oscillibacter</i>    | $1.63 \times 10^{-3}$ | $1.06 \times 10^{-3}$ ,<br>$2.20 \times 10^{-3}$  | $4.46 \times 10^{-3}$ | $2.83 \times 10^{-3}$ ,<br>$6.09 \times 10^{-3}$  | $2.34 \times 10^{-3}$ | $1.49 \times 10^{-3}$ ,<br>$3.20 \times 10^{-3}$  | $2.31 \times 10^{-3}$ | $1.18 \times 10^{-3}$ ,<br>$3.42 \times 10^{-3}$  |      |        |  |  | 0.044   | 0.242  |
| <i>Ruminococcus</i>     | $1.57 \times 10^{-2}$ | $-1.08 \times 10^{-3}$ ,<br>$3.24 \times 10^{-2}$ | $1.04 \times 10^{-2}$ | $4.45 \times 10^{-3}$ ,<br>$1.64 \times 10^{-2}$  | $7.24 \times 10^{-3}$ | $3.21 \times 10^{-3}$ ,<br>$1.13 \times 10^{-2}$  | $1.62 \times 10^{-2}$ | $9.58 \times 10^{-3}$ ,<br>$2.28 \times 10^{-2}$  |      |        |  |  | 0.046   | 0.2486 |
| <i>Paraprevotella</i>   | $3.57 \times 10^{-3}$ | $-3.45 \times 10^{-4}$ ,<br>$7.48 \times 10^{-3}$ | $9.92 \times 10^{-3}$ | $-1.57 \times 10^{-4}$ ,<br>$2.00 \times 10^{-2}$ | $2.55 \times 10^{-3}$ | $3.06 \times 10^{-4}$ ,<br>$4.79 \times 10^{-3}$  | $9.31 \times 10^{-3}$ | $3.52 \times 10^{-3}$ ,<br>$1.51 \times 10^{-2}$  |      |        |  |  | 0.048   | 0.250  |
| <i>Bilophila</i>        | $1.18 \times 10^{-3}$ | $4.22 \times 10^{-4}$ ,<br>$1.95 \times 10^{-3}$  | $1.78 \times 10^{-3}$ | $6.91 \times 10^{-4}$ ,<br>$2.86 \times 10^{-3}$  | $1.41 \times 10^{-3}$ | $4.91 \times 10^{-3}$ ,<br>$2.33 \times 10^{-3}$  | $2.23 \times 10^{-3}$ | $1.36 \times 10^{-3}$ ,<br>$3.09 \times 10^{-3}$  |      |        |  |  | 0.049   | 0.253  |
| <i>Granulicatella</i>   | $1.03 \times 10^{-5}$ | $4.57 \times 10^{-7}$ ,<br>$2.01 \times 10^{-5}$  | $3.59 \times 10^{-5}$ | $1.182 \times 10^{-5}$ ,<br>$5.99 \times 10^{-5}$ | $2.01 \times 10^{-5}$ | $9.88 \times 10^{-6}$ ,<br>$3.04 \times 10^{-5}$  | $8.39 \times 10^{-5}$ | $3.43 \times 10^{-5}$ ,<br>$1.33 \times 10^{-4}$  |      |        |  |  | 0.049   | 0.256  |

FDR: false discovery rate, CI: confidence intervals, FAS: woman acne set, FCS: woman control set, MAS: man acne set, MCS: man control set.
