# Supplementary material for: Gender-Specific Differences in Gut Microbiota Composition Associated with Microbial Metabolites for Patients with Acne Vulgaris
Source: PubMed Central journal article supplement — Ann Dermatol. 2021 Nov 4;33(6):531–40. doi: 10.5021/ad.2021.33.6.531 (PMC8577912; doi:10.5021/ad.2021.33.6.531), 2021-11-04
Supplement: ad-33-531-s002.pdf [file ad-33-531-s002.pdf]

**Supplementary Table 2.** Difference of metabolites between men and women controls

| Metabolites               | MCS             | FCS           | Z value | p-value |
|---------------------------|-----------------|---------------|---------|---------|
| 2-Phenylglycine           | 1.81 ± 1.60     | 0.75 ± 0.60   | -2.06   | 0.039   |
| 3-Hydroxyisovaleric acid  | 0.14 ± 0.09     | 0.54 ± 1.82   | -2.04   | 0.042   |
| D-2-Hydroxyglutaric acid  | 14.34 ± 15.42   | 7.70 ± 9.53   | -2.01   | 0.044   |
| Glyceric acid             | 174.41 ± 298.02 | 61.69 ± 71.39 | -2.56   | 0.011   |
| Glycine                   | 8.68 ± 13.40    | 2.77 ± 2.01   | -2.58   | 0.01    |
| L-Alanine                 | 4.34 ± 6.70     | 1.39 ± 1.00   | -2.55   | 0.011   |
| L-Alpha-aminobutyric acid | 4.40 ± 8.18     | 1.38 ± 2.30   | -2.48   | 0.013   |
| L-Cystine                 | 12.42 ± 19.83   | 2.29 ± 2.86   | -1.76   | 0.078   |
| L-Histidine               | 9.16 ± 10.41    | 3.80 ± 3.36   | -3.08   | 0.002   |
| L-Methionine              | 93.85 ± 63.35   | 38.71 ± 28.07 | -3.65   | <0.001  |
| L-Serine                  | 11.42 ± 6.53    | 8.22 ± 6.90   | -2.06   | 0.039   |
| Myristic acid             | 18.05 ± 23.94   | 7.86 ± 3.35   | -2.01   | 0.044   |
| Ornithine                 | 7.36 ± 21.93    | 0.34 ± 1.13   | -3.35   | 0.001   |
| Putrescine                | 9.53 ± 10.03    | 3.96 ± 8.30   | -2.81   | 0.005   |

Values are presented as mean ± standard error of mean. MCS: man control set, FCS: woman control set.
