# Supplementary material for: Gender-Specific Differences in Gut Microbiota Composition Associated with Microbial Metabolites for Patients with Acne Vulgaris
Source: PubMed Central journal article supplement — Ann Dermatol. 2021 Nov 4;33(6):531–40. doi: 10.5021/ad.2021.33.6.531 (PMC8577912; doi:10.5021/ad.2021.33.6.531), 2021-11-04
Supplement: ad-33-531-s004.pdf [file ad-33-531-s004.pdf]

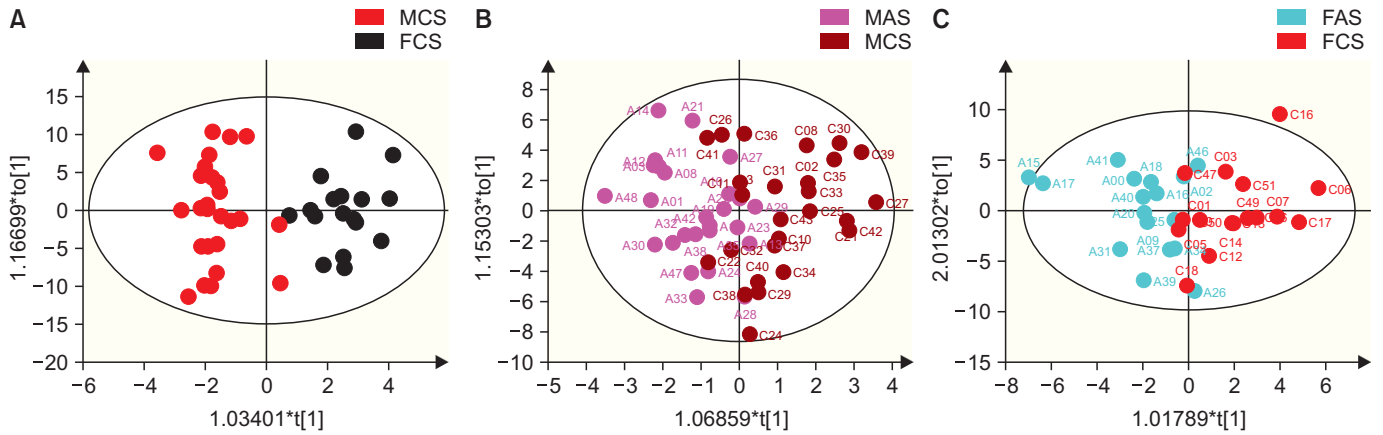

**Supplementary Fig. 2.** Multivariate orthogonal partial least squares discriminant analysis models were applied and the scores plots showed the overall differences of metabolic profiles between two groups. FAS: woman acne set, FCS: woman control set, MAS: man acne set, MCS: man control set.
